# Supplementary material
Source: publisher site journal article supplement (https://www.dovepress.com/article/441859)
Supplement: Supplementary file 1 [file get_supplementary_file.php]

**Appendix 1: The items of upward social comparison via social media** 55,56

Q1: Referring to comparing with better people on social media

Q2: Referring to comparing with those perform better in studies and life

Q3: Referring to thinking of more successful individuals during setbacks

Q4: Referring to comparing social media skills with those of more skilled individuals

Q5: Referring to thinking of more capable individuals when assessing abilities

Q6: Referring to thinking of more successful individuals when assessing studies and life.

**Appendix 2: The items of fear of missing out (FoMO)**17,57

Q1: Relating to fear of missing important information

Q2: Relating to fear of missing information others post or share

Q3: Relating to fear that others have more rewarding experiences

Q4: Relating to anxiety over inability to access latest information

**Appendix 3: The items of mindfulness** 58,59

Q1: Relating to being often troubled by senseless feelings

Q2: Relating to often wandering aimlessly in everyday life

Q3: Relating to keeping busy to avoid feelings.

Q4: Relating to self-blame for feelings

Q5: Relating to ignoring unwanted feelings

Q6: Relating to trouble focusing

Q7: Relating to fatigue from certain thoughts

Q8: Relating to preoccupation with the past

Q9: Relating to negative thoughts considered inappropriate

Q10: Relating to controlling thoughts to avoid discomfort

**Appendix 4: The items of digital hoarding** 62,63

Q1: Relating to the storage habits, like keeping uncommon files

Q2: Relating to the storage habits, like keeping files for future use

Q3: Relating to the storage habits, like keeping files for security

Q4: Relating to the retention of work-related files

Q5: Relating to the effect of deletion on recall time

Q6: Relating to the fear of forgetting information

Q7: Relating to files reflecting personal abilities

Q8: About the consequences of deleting files, like losing a friend

Q9: About the consequences of deleting files, like cutting ties with a friend

Q10: About the consequences of deleting files, like losing of a part of life

Q11: About the consequences of deleting files, like cutting ties with the past

Q12: About emotional comfort from files

Q13: About the consequences of deleting files, like missing opportunities
